# Supplementary material for: Looking, pointing, and talking together: How dyads of differential expertise coordinate attention during conversation
Source: PubMed Central journal article supplement (PMC11658607; doi:10.1371/journal.pone.0315728), 2024-12-19

## S4 Appendix. All DCRPs and ANOVA results

In the Results section we reported that all mentioned DCRPs were found to be coupled at above chance levels. Below we report all respective DCRPs together with each a 2 (profiles; coupled behaviors vs. randomized baseline)  $\times$  43 (lags) mixed-design analysis of variance (ANOVA; with lag as the repeated measures factor). Each comparison of a profile to its randomized baseline shows the same pattern of a significant main effect for both profile and lag as well as an interaction of both. This means that all DCRPs under investigation were coupled at above chance levels and to varying degrees across lags.

| Measure                            | Effect        | <i>df</i> | <i>F</i>   |
|------------------------------------|---------------|-----------|------------|
| 1) tr_gaze_utr_gaze   tr_speaking  | Lags          | 42        | 74.93***   |
|                                    | Profiles      | 1         | 1478.29*** |
|                                    | Lags:Profiles | 42        | 7.01***    |
| 2) tr_gaze_utr_gaze   utr_speaking | Lags          | 42        | 39.14***   |
|                                    | Profiles      | 1         | 1075.84*** |
|                                    | Lags:Profiles | 42        | 11.23***   |
| 3) tr_point_tr_gaze                | Lags          | 42        | 15.66***   |
|                                    | Profiles      | 1         | 636.86***  |
|                                    | Lags:Profiles | 42        | 2.98***    |
| 4) utr_point_utr_gaze              | Lags          | 42        | 8.86***    |
|                                    | Profiles      | 1         | 575.33***  |
|                                    | Lags:Profiles | 42        | 2.39***    |
| 5) tr_point_utr_gaze               | Lags          | 42        | 12.52***   |
|                                    | Profiles      | 1         | 677.47***  |
|                                    | Lags:Profiles | 42        | 2.64***    |
| 6) utr_point_tr_gaze               | Lags          | 42        | 8.86***    |
|                                    | Profiles      | 1         | 575.33***  |
|                                    | Lags:Profiles | 42        | 2.39***    |

*Note.* tr = trained, utr = untrained. \*\*\*  $p < .001$

1) DCRP of Trained Gaze and Untrained Gaze while Trained Speaking

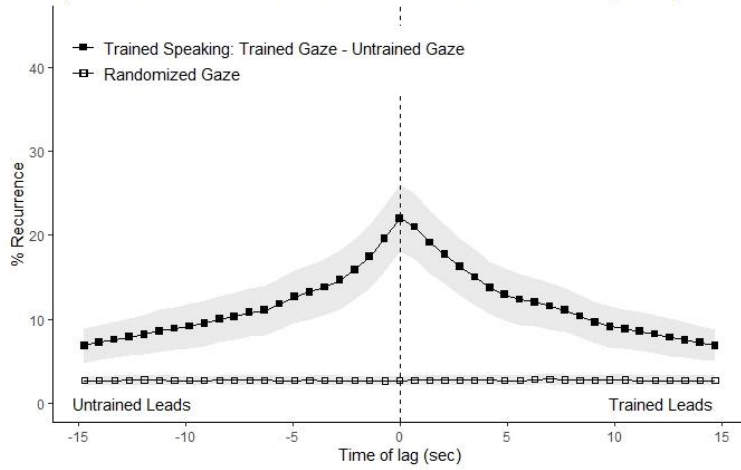

2) DCRP of Trained Gaze and Untrained Gaze while Untrained Speaking

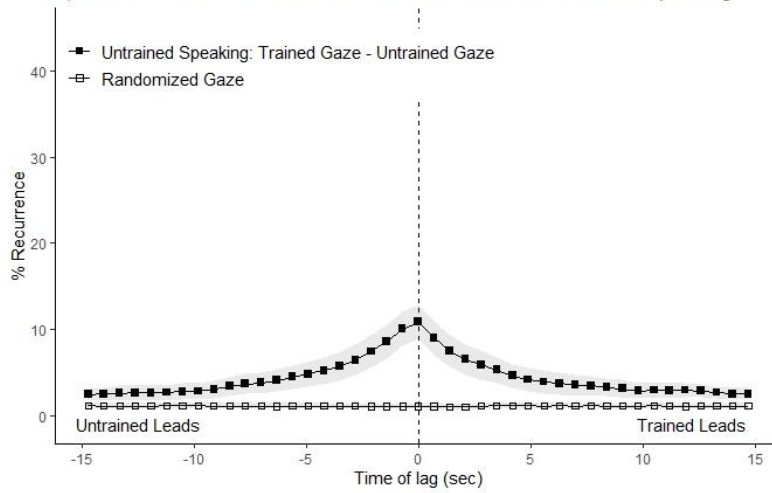

3) DCRP of Trained Pointing and Trained Looking

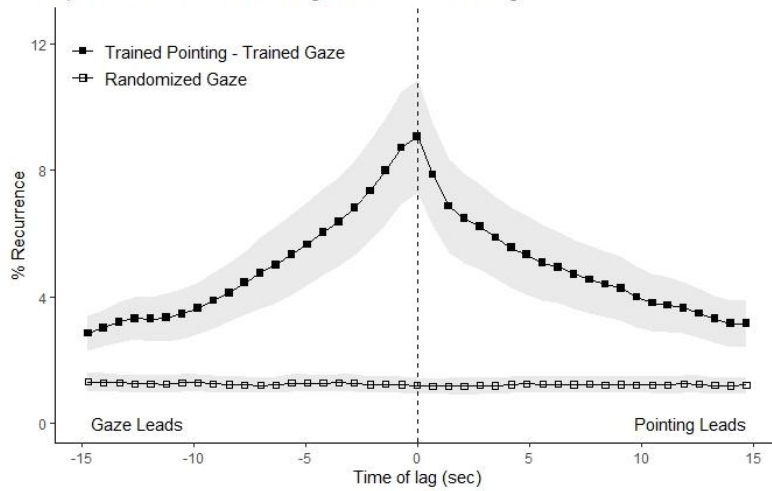

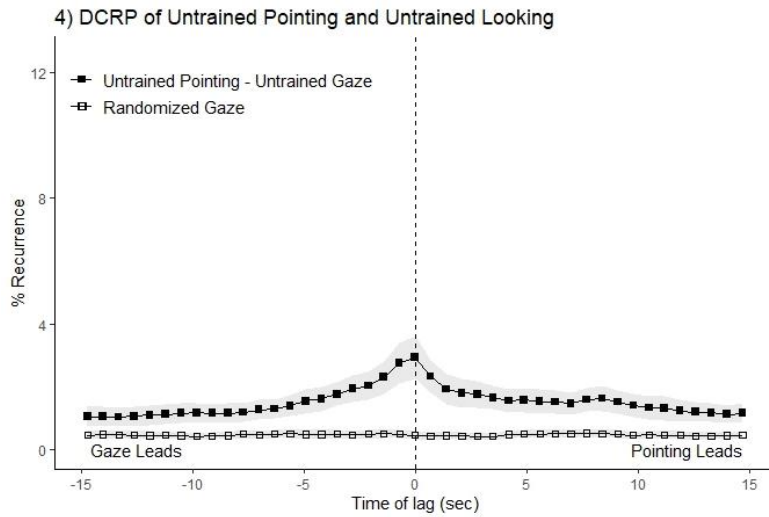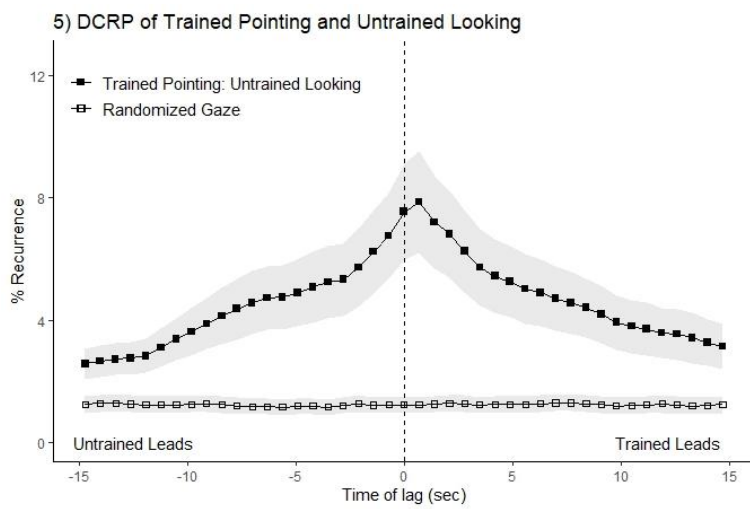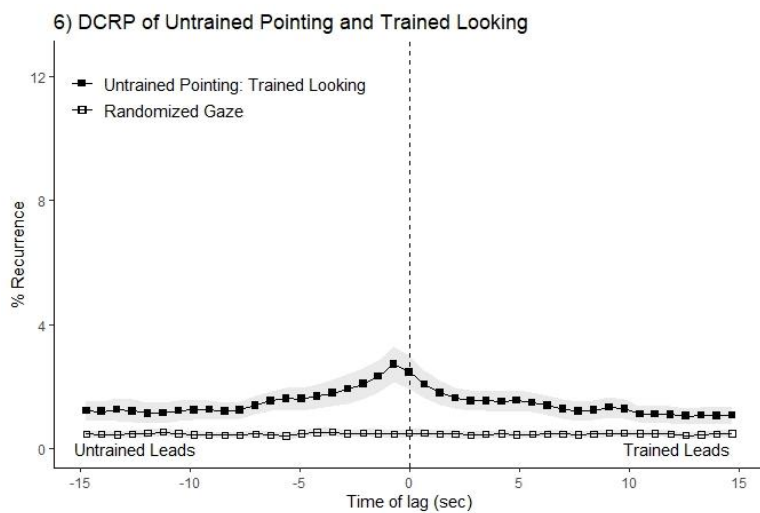

Supplement: pone.0315728.s004.pdf [file pone.0315728.s004.pdf]
